# Supplementary material for: Assessing the Effects of Anthropogenic Land Use on Soil Infiltration Rate in a Tropical West African Watershed (Ouriyori, Benin)
Source: Hindawi journal article supplement (doi:10.1155/2022/8565571), 2022-04-29
Supplement: f1 [file 8565571.f1.docx]

Table: Descriptive statistics of Ks and Log Ks in cropland and fallow land.

| Variables | LU | Mean  (cm d-1) | Median (cm d-1) | SD | CV (%) | Max.  (cm d-1) | Min.  (cm d-1) | Skew. Z-value | Kurt. Z-value | Shapiro-Wilk p-value |
| --- | --- | --- | --- | --- | --- | --- | --- | --- | --- | --- |
| Ks | Cropland | 318.1 | 274.5 | 205.6 | 64.6 | 989.7 | 50.4 | 5.43 | 3.99 | <0.0001 |
| Fallow land | 473.5 | 374.4 | 325.2 | 68.6 | 1527.4 | 94.8 | 6.08 | 3.75 | <0.001 |
| LogKs | Cropland | 2.42 | 2.45 | 0.2 | 11.4 | 2.99 | 1.70 | -0.29 | -0.99 | 0.19 |
| Fallow land | 2.59 | 2.58 | 0.28 | 10.69 | 3.18 | 1.98 | 0.25 | -0.22 | 0.22 |

SD stands for standard deviation, CV for coefficient of variation, Skew. for Skewness, Kurt. for Kurtosis, max for maximum value and min for minimum value.
